# Supplementary material for: Photocatalyst Based on Nanostructured TiO2 with Improved Photocatalytic and Antibacterial Properties
Source: MDPI journal article supplement (doi:10.3390/ma16247509), 2023-12-05
Supplement: s1 [file s1]

## Supplementary Materials

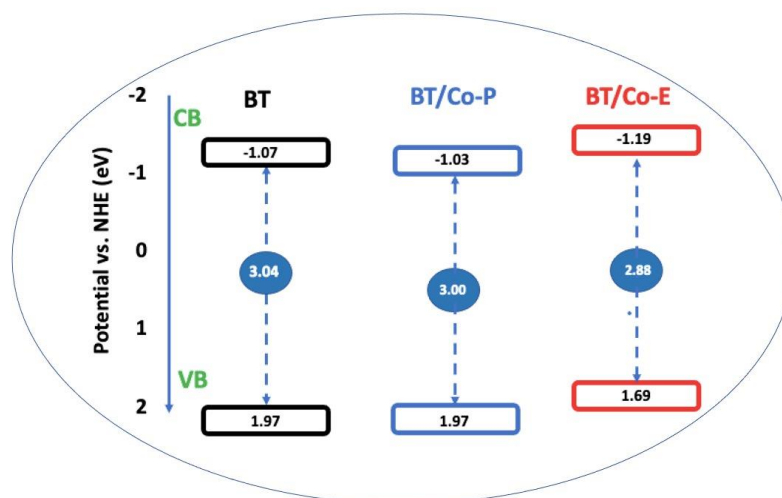

**Figure S1.** Schematic energy-level diagram of the BT, BT/Co-P and BT/Co-E photoelectrodes.

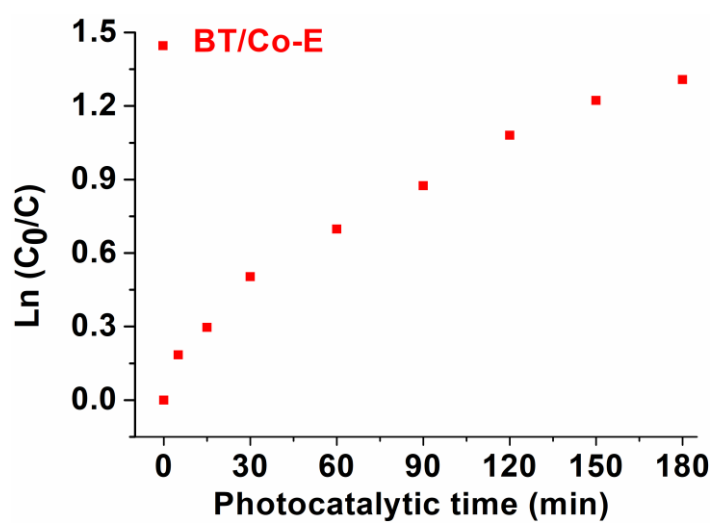

**Figure S2.** Photodegradation kinetics curve of DOX, pH=6.5
